# Supplementary material
Source: PubMed Central journal article supplement (PMC7301222)
Supplement: NIHMS1541749-supplement-40272_2019_362_MOESM1_ESM.pdf [file NIHMS1541749-supplement-40272_2019_362_MOESM1_ESM.pdf]

# **Treatment withdrawal following remission in juvenile idiopathic arthritis: a systematic review of the literature**

Olha Halyabar, Jay Mehta, Sarah Ringold, MD, Dax G. Rumsey, Daniel B. Horton

*Pediatric Drugs*, 2019

Electronic Supplementary Material

Table S1. Assessment of quality of evidence in regard to medication withdrawal in remission of JIA: observational papers on methotrexate

|                                                                                                                                                                                                                                            | Klotsche, 2018 [1] | Gottlieb, 1997 [2]                                             | Ravelli, 1995 [3]                                                               |
|--------------------------------------------------------------------------------------------------------------------------------------------------------------------------------------------------------------------------------------------|--------------------|----------------------------------------------------------------|---------------------------------------------------------------------------------|
| 1. Was the research question or objective in this paper clearly stated?                                                                                                                                                                    | Y                  | Y                                                              | Y                                                                               |
| 2. Was the study population clearly specified and defined?                                                                                                                                                                                 | Y                  | Y                                                              | Y                                                                               |
| 3. Was the participation rate of eligible persons at least 50%?                                                                                                                                                                            | CD                 | Y                                                              | Y                                                                               |
| 4. Were all the subjects selected or recruited from the same or similar populations (including the same time period)? Were inclusion and exclusion criteria for being in the study prespecified and applied uniformly to all participants? | Y                  | Y                                                              | Y                                                                               |
| 5. Was a sample size justification, power description, or variance and effect estimates provided?                                                                                                                                          | Y                  | Y                                                              | N                                                                               |
| 6. For the analyses in this paper, were the exposure(s) of interest measured prior to the outcome(s) being measured?                                                                                                                       | Y                  | Y                                                              | Y                                                                               |
| 7. Was the timeframe sufficient so that one could reasonably expect to see an association between exposure and outcome if it existed?                                                                                                      | Y                  | Y                                                              | Y                                                                               |
| 8. For exposures that can vary in amount or level, did the study examine different levels of the exposure as related to the outcome (e.g., categories of exposure, or exposure measured as continuous variable)?                           | Y                  | N                                                              | N                                                                               |
| 9. Were the exposure measures (independent variables) clearly defined, valid, reliable, and implemented consistently across all study participants?                                                                                        | N                  | Y                                                              | Y                                                                               |
| 10. Was the exposure(s) assessed more than once over time?                                                                                                                                                                                 | Y                  | Y                                                              | N                                                                               |
| 11. Were the outcome measures (dependent variables) clearly defined, valid, reliable, and implemented consistently across all study participants?                                                                                          | Y                  | N                                                              | N                                                                               |
| 12. Were the outcome assessors blinded to the exposure status of participants?                                                                                                                                                             | N                  | N                                                              | N                                                                               |
| 13. Was loss to follow-up after baseline 20% or less?                                                                                                                                                                                      | N                  | Y                                                              | Y                                                                               |
| 14. Were key potential confounding variables measured and adjusted statistically for their impact on the relationship between exposure(s) and outcome(s)?                                                                                  | Y                  | N                                                              | N                                                                               |
| Quality rating: good, fair, or poor?                                                                                                                                                                                                       | Fair               | Poor                                                           | Poor                                                                            |
| Explanation of poor rating                                                                                                                                                                                                                 |                    | Heterogeneous population, limited consideration of confounders | Small sample, unclear validity of outcome, limited consideration of confounders |

CD cannot determine, N no, Y yes

Table S2. Assessment of quality of evidence in regard to medication withdrawal in remission of JIA: randomized trials on methotrexate

|                                                                                                                                                                      | Foell, 2010 [4] |
|----------------------------------------------------------------------------------------------------------------------------------------------------------------------|-----------------|
| 1. Was the study described as randomized, a randomized trial, a randomized clinical trial, or an RCT?                                                                | Y               |
| 2. Was the method of randomization adequate (i.e., use of randomly generated assignment)?                                                                            | Y               |
| 3. Was the treatment allocation concealed (so that assignments could not be predicted)?                                                                              | N               |
| 4. Were study participants and providers blinded to treatment group assignment?                                                                                      | N               |
| 5. Were the people assessing the outcomes blinded to the participants' group assignments?                                                                            | N               |
| 6. Were the groups similar at baseline on important characteristics that could affect outcomes (e.g., demographics, risk factors, co-morbid conditions)?             | Y               |
| 7. Was the overall drop-out rate from the study at endpoint 20% or lower of the number allocated to treatment?                                                       | Y               |
| 8. Was the differential drop-out rate (between treatment groups) at endpoint 15 percentage points or lower?                                                          | Y               |
| 9. Was there high adherence to the intervention protocols for each treatment group?                                                                                  | N               |
| 10. Were other interventions avoided or similar in the groups (e.g., similar background treatments)?                                                                 | Y               |
| 11. Were outcomes assessed using valid and reliable measures, implemented consistently across all study participants?                                                | Y               |
| 12. Did the authors report that the sample size was sufficiently large to be able to detect a difference in the main outcome between groups with at least 80% power? | Y               |
| 13. Were outcomes reported or subgroups analyzed prespecified (i.e., identified before analyses were conducted)?                                                     | Y               |
| 14. Were all randomized participants analyzed in the group to which they were originally assigned, i.e., did they use an intention-to-treat analysis?                | Y               |
| Quality rating: good, fair, or poor?                                                                                                                                 | Fair            |
| Explanation of poor rating                                                                                                                                           |                 |

N no, Y yes

Table S3. Assessment of quality of evidence in regard to medication withdrawal in remission of JIA<sup>1</sup>: observational papers on biologics<sup>2</sup>

|                                                                                                                                                                                                                                            | Minden, 2019 [5] | Ter Haar, 2019 [6] | Aquilani, 2018 [7] | Lovell, 2018 [8] | Ruperto, 2018 [9] | Simonini, 2018 [10] | Su, 2017 [11] | Iglesias, 2014 [12] | Cai, 2013 [13] | Postepski, 2013 [14] | Baszis, 2011 [15] | Otten, 2011 [16] | Pratsidou-Gertsis, 2010 [17] | Remesal, 2010 [18] | Prince, 2009 [19] |
|--------------------------------------------------------------------------------------------------------------------------------------------------------------------------------------------------------------------------------------------|------------------|--------------------|--------------------|------------------|-------------------|---------------------|---------------|---------------------|----------------|----------------------|-------------------|------------------|------------------------------|--------------------|-------------------|
| 1. Was the research question or objective in this paper clearly stated?                                                                                                                                                                    | Y                | Y                  | Y                  | Y                | NA                | Y                   | NA            | Y                   | Y              | Y                    | Y                 | NA               | Y                            | Y                  | Y                 |
| 2. Was the study population clearly specified and defined?                                                                                                                                                                                 | Y                | Y                  | Y                  | Y                | Y                 | Y                   | Y             | Y                   | Y              | Y                    | Y                 | Y                | Y                            | Y                  | Y                 |
| 3. Was the participation rate of eligible persons at least 50%?                                                                                                                                                                            | CD               | Y                  | Y                  | Y                | NA                | Y                   | CD            | Y                   | CD             | CD                   | Y                 | Y                | Y                            | Y                  | Y                 |
| 4. Were all the subjects selected or recruited from the same or similar populations (including the same time period)? Were inclusion and exclusion criteria for being in the study prespecified and applied uniformly to all participants? | N                | Y                  | N                  | N                | Y                 | CD                  | CD            | Y                   | Y              | CD                   | Y                 | Y                | Y                            | N                  | N                 |
| 5. Was a sample size justification, power description, or variance and effect estimates provided?                                                                                                                                          | Y                | N                  | Y                  | Y                | NA                | Y                   | Y             | N                   | N              | N                    | Y                 | NA               | N                            | Y                  | N                 |
| 6. For the analyses in this paper, were the exposure(s) of interest measured prior to the outcome(s) being measured?                                                                                                                       | Y                | Y                  | Y                  | Y                | NA                | Y                   | Y             | Y                   | Y              | Y                    | Y                 | Y                | Y                            | Y                  | Y                 |
| 7. Was the timeframe sufficient so that one could reasonably expect to see an association between exposure and outcome if it existed?                                                                                                      | Y                | Y                  | Y                  | Y                | Y                 | Y                   | Y             | Y                   | Y              | Y                    | Y                 | Y                | CD                           | Y                  | Y                 |
| 8. For exposures that can vary in amount or level, did the study examine different levels of the exposure as related to the outcome (e.g., categories of exposure, or exposure measured as continuous variable)?                           | Y                | NA                 | Y                  | Y                | NA                | Y                   | Y             | N                   | Y              | Y                    | Y                 | Y                | N                            | Y                  | Y                 |
| 9. Were the exposure measures (independent variables) clearly defined, valid, reliable, and implemented consistently across all study participants?                                                                                        | Y                | Y                  | Y                  | Y                | Y                 | Y                   | Y             | Y                   | Y              | Y                    | Y                 | Y                | Y                            | Y                  | Y                 |
| 10. Was the exposure(s) assessed more than once over time?                                                                                                                                                                                 | N                | N                  | N                  | N                | N                 | N                   | N             | N                   | N              | N                    | Y                 | N                | N                            | N                  | N                 |
| 11. Were the outcome measures (dependent variables) clearly defined, valid, reliable, and implemented consistently across all study participants?                                                                                          | Y                | Y                  | Y                  | Y                | Y                 | Y                   | N             | N                   | Y              | N                    | Y                 | N                | N                            | Y                  | N                 |
| 12. Were the outcome assessors blinded to the exposure status of participants?                                                                                                                                                             | N                | N                  | N                  | N                | NA                | N                   | N             | N                   | N              | N                    | N                 | N                | N                            | N                  | N                 |
| 13. Was loss to follow-up after baseline 20% or less?                                                                                                                                                                                      | Y                | Y                  | CD                 | N                | Y                 | CD                  | CD            | CD                  | Y              | CD                   | CD                | CD               | CD                           | CD                 | CD                |
| 14. Were key potential confounding variables measured and adjusted statistically for their impact on the relationship between exposure(s) and outcome(s)?                                                                                  | N                | Y                  | Y                  | Y                | NA                | N                   | N             | N                   | N              | N                    | N                 | NA               | N                            | N                  | N                 |

| Quality rating: good, fair, or poor? | Fair | Fair | Fair | Fair | Fair | Fair | Poor                                                                                                                            | Poor                                      | Fair | Poor                                                                    | Fair | Fair | Poor                                                     | Poor                                                                              | Poor                                                                              |
|--------------------------------------|------|------|------|------|------|------|---------------------------------------------------------------------------------------------------------------------------------|-------------------------------------------|------|-------------------------------------------------------------------------|------|------|----------------------------------------------------------|-----------------------------------------------------------------------------------|-----------------------------------------------------------------------------------|
| Explanation of poor rating           |      |      |      |      |      |      | Unclear composition of comparison groups, unclear if inclusion criteria uniformly applied, limited consideration of confounders | Small sample, unclear validity of outcome |      | Small sample, unclear validity of outcome, unclear time period of study |      |      | Small sample, limited validity of exposures and outcomes | Selection bias (did not include those who tapered but did not stop), small sample | Selection bias (did not include those who tapered but did not stop), small sample |

CD cannot determine, N no, NA not applicable, Y yes

<sup>1</sup> Studies that did not primarily focus on treatment withdrawal were evaluated with respect to the content on treatment withdrawal

<sup>2</sup> Observational studies included randomized trials that did not primarily focus on treatment withdrawal

Table S4. Assessment of quality of evidence in regard to medication withdrawal in remission of JIA<sup>1</sup>: observational papers on combination treatment<sup>2</sup>

|                                                                                                                                                                                                                                            | Hissink Muller, 2018 [20] | Guzman, 2016 [21] | Chang, 2015 [22] | Wallace, 2014 [23] |
|--------------------------------------------------------------------------------------------------------------------------------------------------------------------------------------------------------------------------------------------|---------------------------|-------------------|------------------|--------------------|
| 1. Was the research question or objective in this paper clearly stated?                                                                                                                                                                    | NA                        | Y                 | Y                | NA                 |
| 2. Was the study population clearly specified and defined?                                                                                                                                                                                 | Y                         | Y                 | Y                | Y                  |
| 3. Was the participation rate of eligible persons at least 50%?                                                                                                                                                                            | Y                         | Y                 | Y                | Y                  |
| 4. Were all the subjects selected or recruited from the same or similar populations (including the same time period)? Were inclusion and exclusion criteria for being in the study prespecified and applied uniformly to all participants? | Y                         | Y                 | N                | Y                  |
| 5. Was a sample size justification, power description, or variance and effect estimates provided?                                                                                                                                          | NA                        | Y                 | N                | N                  |
| 6. For the analyses in this paper, were the exposure(s) of interest measured prior to the outcome(s) being measured?                                                                                                                       | Y                         | Y                 | Y                | Y                  |
| 7. Was the timeframe sufficient so that one could reasonably expect to see an association between exposure and outcome if it existed?                                                                                                      | N                         | Y                 | Y                | Y                  |
| 8. For exposures that can vary in amount or level, did the study examine different levels of the exposure as related to the outcome (e.g., categories of exposure, or exposure measured as continuous variable)?                           | NA                        | Y                 | Y                | NA                 |
| 9. Were the exposure measures (independent variables) clearly defined, valid, reliable, and implemented consistently across all study participants?                                                                                        | Y                         | Y                 | Y                | NA                 |
| 10. Was the exposure(s) assessed more than once over time?                                                                                                                                                                                 | N                         | N                 | N                | NA                 |
| 11. Were the outcome measures (dependent variables) clearly defined, valid, reliable, and implemented consistently across all study participants?                                                                                          | Y                         | Y                 | Y                | Y                  |
| 12. Were the outcome assessors blinded to the exposure status of participants?                                                                                                                                                             | Y                         | N                 | N                | NA                 |
| 13. Was loss to follow-up after baseline 20% or less?                                                                                                                                                                                      | Y                         | Y                 | N                | N                  |
| 14. Were key potential confounding variables measured and adjusted statistically for their impact on the relationship between exposure(s) and outcome(s)?                                                                                  | NA                        | Y                 | N                | N                  |
| Quality rating: good, fair, or poor?                                                                                                                                                                                                       | Fair                      | Good              | Fair             | Fair               |
| Explanation of poor rating                                                                                                                                                                                                                 |                           |                   |                  |                    |

N no, NA not applicable, Y yes

<sup>1</sup> Studies that did not primarily focus on treatment withdrawal were evaluated with respect to the content on treatment withdrawal

<sup>2</sup> Observational studies included randomized trials that did not primarily focus on treatment withdrawal

Table S5. Assessment of quality of evidence in regard to medication withdrawal in remission of JIA<sup>1</sup>: observational papers on uveitis

|                                                                                                                                                                                                                                            | Acharya, 2018 [24]                                                                                                                   | Breitbach, 2017 [25] | Simonini, 2017 [26]                                                                                | Lerman, 2015 [27] | Shakoor, 2014 [28]                                                                                  | Saboo, 2013 [29]                                                                                                                | Kalinina Ayuso, 2011 [30] |
|--------------------------------------------------------------------------------------------------------------------------------------------------------------------------------------------------------------------------------------------|--------------------------------------------------------------------------------------------------------------------------------------|----------------------|----------------------------------------------------------------------------------------------------|-------------------|-----------------------------------------------------------------------------------------------------|---------------------------------------------------------------------------------------------------------------------------------|---------------------------|
| 1. Was the research question or objective in this paper clearly stated?                                                                                                                                                                    | Y                                                                                                                                    | NA                   | Y                                                                                                  | Y                 | Y                                                                                                   | Y                                                                                                                               | Y                         |
| 2. Was the study population clearly specified and defined?                                                                                                                                                                                 | Y                                                                                                                                    | Y                    | Y                                                                                                  | Y                 | Y                                                                                                   | Y                                                                                                                               | Y                         |
| 3. Was the participation rate of eligible persons at least 50%?                                                                                                                                                                            | CD                                                                                                                                   | Y                    | Y                                                                                                  | Y                 | Y                                                                                                   | Y                                                                                                                               | Y                         |
| 4. Were all the subjects selected or recruited from the same or similar populations (including the same time period)? Were inclusion and exclusion criteria for being in the study prespecified and applied uniformly to all participants? | N                                                                                                                                    | Y                    | N                                                                                                  | Y                 | N                                                                                                   | N                                                                                                                               | Y                         |
| 5. Was a sample size justification, power description, or variance and effect estimates provided?                                                                                                                                          | Y                                                                                                                                    | N                    | Y                                                                                                  | Y                 | Y                                                                                                   | Y                                                                                                                               | Y                         |
| 6. For the analyses in this paper, were the exposure(s) of interest measured prior to the outcome(s) being measured?                                                                                                                       | Y                                                                                                                                    | Y                    | Y                                                                                                  | Y                 | Y                                                                                                   | Y                                                                                                                               | Y                         |
| 7. Was the timeframe sufficient so that one could reasonably expect to see an association between exposure and outcome if it existed?                                                                                                      | Y                                                                                                                                    | NA                   | Y                                                                                                  | Y                 | Y                                                                                                   | Y                                                                                                                               | Y                         |
| 8. For exposures that can vary in amount or level, did the study examine different levels of the exposure as related to the outcome (e.g., categories of exposure, or exposure measured as continuous variable)?                           | Y                                                                                                                                    | NA                   | Y                                                                                                  | Y                 | Y                                                                                                   | Y                                                                                                                               | Y                         |
| 9. Were the exposure measures (independent variables) clearly defined, valid, reliable, and implemented consistently across all study participants?                                                                                        | Y                                                                                                                                    | NA                   | Y                                                                                                  | Y                 | Y                                                                                                   | Y                                                                                                                               | Y                         |
| 10. Was the exposure(s) assessed more than once over time?                                                                                                                                                                                 | N                                                                                                                                    | NA                   | N                                                                                                  | N                 | N                                                                                                   | N                                                                                                                               | N                         |
| 11. Were the outcome measures (dependent variables) clearly defined, valid, reliable, and implemented consistently across all study participants?                                                                                          | Y                                                                                                                                    | Y                    | Y                                                                                                  | N                 | Y                                                                                                   | Y                                                                                                                               | Y                         |
| 12. Were the outcome assessors blinded to the exposure status of participants?                                                                                                                                                             | N                                                                                                                                    | N                    | N                                                                                                  | N                 | N                                                                                                   | N                                                                                                                               | N                         |
| 13. Was loss to follow-up after baseline 20% or less?                                                                                                                                                                                      | CD                                                                                                                                   | CD                   | CD                                                                                                 | CD                | CD                                                                                                  | N                                                                                                                               | CD                        |
| 14. Were key potential confounding variables measured and adjusted statistically for their impact on the relationship between exposure(s) and outcome(s)?                                                                                  | N                                                                                                                                    | NA                   | N                                                                                                  | NA                | N                                                                                                   | N                                                                                                                               | N                         |
| Quality rating: good, fair, or poor?                                                                                                                                                                                                       | Poor                                                                                                                                 | Fair                 | Fair                                                                                               | Fair              | Poor                                                                                                | Poor                                                                                                                            | Fair                      |
| Explanation of poor rating                                                                                                                                                                                                                 | Small sample; long study period with incomplete adjustment for changes in clinical practice; overfit models without disease severity |                      | Selection bias (inclusion only of people who stopped, requirement for ≥6 months f/u off treatment) |                   | Very heterogeneous population, small sample (4) with JIA, limited consideration of disease severity | Small sample, long study period with incomplete adjustment for changes in clinical practice, limited adjustment for confounding |                           |

CD cannot determine, N no, NA not applicable, Y yes

<sup>1</sup> Studies that did not primarily focus on treatment withdrawal were evaluated with respect to the content on treatment withdrawal

## References

1. Klotsche J, Minden K, Niewerth M, Horneff G. Time spent in inactive disease before MTX withdrawal is relevant with regard to the flare risk in patients with JIA. *Ann Rheum Dis*. 2018 Jul;77(7):996-1002.
2. Gottlieb BS, Keenan GF, Lu T, Ilowite NT. Discontinuation of methotrexate treatment in juvenile rheumatoid arthritis. *Pediatrics*. 1997 Dec;100(6):994-7.
3. Ravelli A, Viola S, Ramenghi B, Aramini L, Ruperto N, Martini A. Frequency of relapse after discontinuation of methotrexate therapy for clinical remission in juvenile rheumatoid arthritis. *J Rheumatol*. 1995 Aug;22(8):1574-6.
4. Foell D, Wulffraat N, Wedderburn LR, Wittkowski H, Frosch M, Gerss J, et al. Methotrexate withdrawal at 6 vs 12 months in juvenile idiopathic arthritis in remission: a randomized clinical trial. *JAMA*. 2010 Apr 7;303(13):1266-73.
5. Minden K, Horneff G, Niewerth M, Seipelt E, Aringer M, Aries P, et al. Time of Disease-Modifying Antirheumatic Drug Start in Juvenile Idiopathic Arthritis and the Likelihood of a Drug-Free Remission in Young Adulthood. *Arthritis care & research*. 2019 Apr;71(4):471-81.
6. Ter Haar NM, van Dijkhuizen EHP, Swart JF, van Royen-Kerkhof A, El Idrissi A, Leek AP, et al. Treatment to Target Using Recombinant Interleukin-1 Receptor Antagonist as First-Line Monotherapy in New-Onset Systemic Juvenile Idiopathic Arthritis: Results From a Five-Year Follow-Up Study. *Arthritis Rheumatol (Hoboken, NJ)*. 2019 Jul;71(7):1163-73.
7. Aquilani A, Pires Marafon D, Marasco E, Nicolai R, Messia V, Perfetti F, et al. Predictors of Flare Following Etanercept Withdrawal in Patients with Rheumatoid Factor-negative Juvenile Idiopathic Arthritis Who Reached Remission while Taking Medication. *J Rheumatol*. 2018 Jul;45(7):956-961.
8. Lovell DJ, Johnson AL, Huang B, Gottlieb BS, Morris PW, Kimura Y, et al. Risk, Timing, and Predictors of Disease Flare After Discontinuation of Anti-Tumor Necrosis Factor Therapy in Children With Polyarticular Forms of Juvenile Idiopathic Arthritis With Clinically Inactive Disease. *Arthritis Rheumatol*. 2018 Sep;70(9):1508-18.
9. Ruperto N, Brunner HI, Quartier P, Constantin T, Wulffraat NM, Horneff G, et al. Canakinumab in patients with systemic juvenile idiopathic arthritis and active systemic features: results from the 5-year long-term extension of the phase III pivotal trials. *Ann Rheum Dis*. 2018 Dec;77(12):1710-1719.
10. Simonini G, Ferrara G, Pontikaki I, Scoccimarro E, Giani T, Taddio A, et al. Flares after withdrawal of biologic therapies in juvenile idiopathic arthritis: Clinical and laboratory correlates of remission duration. *Arthritis Care Res*. 2018 Jul;70(7):1046-1051.
11. Su Y, Yang YH, Chiang BL. Treatment response to etanercept in methotrexate refractory juvenile idiopathic arthritis: an analysis of predictors and long-term outcomes. *Clin Rheumatol*. 2017 Sep;36(9):1997-2004.
12. Iglesias E, Torrente-Segarra V, Bou R, Ricart S, González MI, Sánchez J, et al. Non-systemic juvenile idiopathic arthritis outcome after reaching clinical remission with anti-TNF- $\alpha$  therapy: A clinical practice observational study of patients who discontinued treatment. *Rheumatol Int*. 2014;34(8):1053-7.
13. Cai Y, Liu X, Zhang W, Xu J, Cao L. Clinical trial of etanercept tapering in juvenile idiopathic arthritis during remission. *Rheumatol Int*. 2013 Sep;33(9):2277-82.
14. Postepski J, Kobusinska K, Olesinska E, Osinska V, Opoka-Winiarska V. Clinical remission in juvenile idiopathic arthritis after termination of etanercept. *Rheumatol Int*. 2013 Oct;33(10):2657-60.
15. Baszis K, Garbutt J, Toib D, Mao J, King A, White A, et al. Clinical outcomes after withdrawal of anti-tumor necrosis factor alpha therapy in patients with juvenile idiopathic arthritis: a twelve-year experience. *Arthritis Rheum*. 2011 Oct;63(10):3163-8.
16. Otten MH, Prince FH, Armbrust W, ten Cate R, Hoppenreijns EP, Twilt M, et al. Factors associated with treatment response to etanercept in juvenile idiopathic arthritis. *Jama*. 2011 Dec 7;306(21):2340-7.
17. Pratsidou-Gertsi P, Trachana M, Pardalos G, Kanakoudi-Tsakalidou F. A follow-up study of patients with juvenile idiopathic arthritis who discontinued etanercept due to disease remission. *Clin Exp Rheumatol*. 2010 Nov-Dec;28(6):919-22.
18. Remesal A, J DEI, Merino R, Garcia-Consuegra J. Discontinuation of etanercept after successful treatment in patients with juvenile idiopathic arthritis. *J Rheumatol*. 2010 Sep;37(9):1970-1.
19. Prince FH, Twilt M, Simon SC, van Rossum MA, Armbrust W, Hoppenreijns EP, et al. When and how to stop etanercept after successful treatment of patients with juvenile idiopathic arthritis. *Ann Rheum Dis*. 2009 Jul;68(7):1228-9.
20. Hissink Muller P, Brinkman D, Schonenberg-Meinema D, Van Den Bosch W, Koopman-Keemink Y, Brederije I, et al. Treatment strategy study in new onset DMARD naive juvenile idiopathic arthritis first results on 24 months clinical outcome. *Ann Rheum Dis*. 2018;77:478.



21. Guzman J, Oen K, Huber AM, Watanabe Duffy K, Boire G, Shiff N, et al. The risk and nature of flares in juvenile idiopathic arthritis: results from the ReACCh-Out cohort. *Ann Rheum Dis*. 2016 Jun;75(6):1092-8.
22. Chang CY, Meyer RM, Reiff AO. Impact of medication withdrawal method on flare-free survival in patients with juvenile idiopathic arthritis on combination therapy. *Arthritis Care Res*. 2015 May;67(5):658-66.
23. Wallace CA, Ringold S, Bohnsack J, Spalding SJ, Brunner HI, Milojevic D, et al. Extension study of participants from the trial of early aggressive therapy in juvenile idiopathic arthritis. *J Rheumatol*. 2014;41(12):2459-65.
24. Acharya NR, Patel S, Homayounfar G, Enanoria WTA, Shakoor A, Chakrabarti A, et al. Relapse of Juvenile Idiopathic Arthritis-Associated Uveitis after Discontinuation of Immunomodulatory Therapy. *Ocul Immunol Inflamm*. 2018 Feb 16:1-7.
25. Breitbach M, Tappeiner C, Bohm MR, Zurek-Imhoff B, Heinz C, Thanos S, et al. Discontinuation of long-term adalimumab treatment in patients with juvenile idiopathic arthritis-associated uveitis. *Graefes Arch Clin Exp Ophthalmol*. 2017 Jan;255(1):171-7.
26. Simonini G, Bracaglia C, Cattalini M, Taddio A, Brambilla A, De Libero C, et al. Predictors of Relapse after Discontinuing Systemic Treatment in Childhood Autoimmune Chronic Uveitis. *J Rheumatol*. 2017 Jun;44(6):822-6.
27. Lerman MA, Lewen MD, Kempen JH, Mills MD. Uveitis Reactivation in Children Treated With Tumor Necrosis Factor Alpha Inhibitors. *Am J Ophthalmol*. 2015 Jul;160(1):193-200.e1.
28. Shakoor A, Esterberg E, Acharya NR. Recurrence of uveitis after discontinuation of infliximab. *Ocul Immunol Inflamm*. 2014 Apr;22(2):96-101.
29. Saboo US, Metzinger JL, Radwan A, Arcinue C, Parikh R, Mohamed A, et al. Risk factors associated with the relapse of uveitis in patients with juvenile idiopathic arthritis: a preliminary report. *J AAPOS*. 2013 Oct;17(5):460-4.
30. Kalinina Ayuso V, van de Winkel EL, Rothova A, de Boer JH. Relapse rate of uveitis post-methotrexate treatment in juvenile idiopathic arthritis. *Am J Ophthalmol*. 2011 Feb;151(2):217-22.
